# Supplementary material
Source: HighWire-hosted journal article supplement (https://jnm.snmjournals.org/highwire/filestream/93942/field_highwire_adjunct_files/0/47324_Supplementary_Figures.pdf)

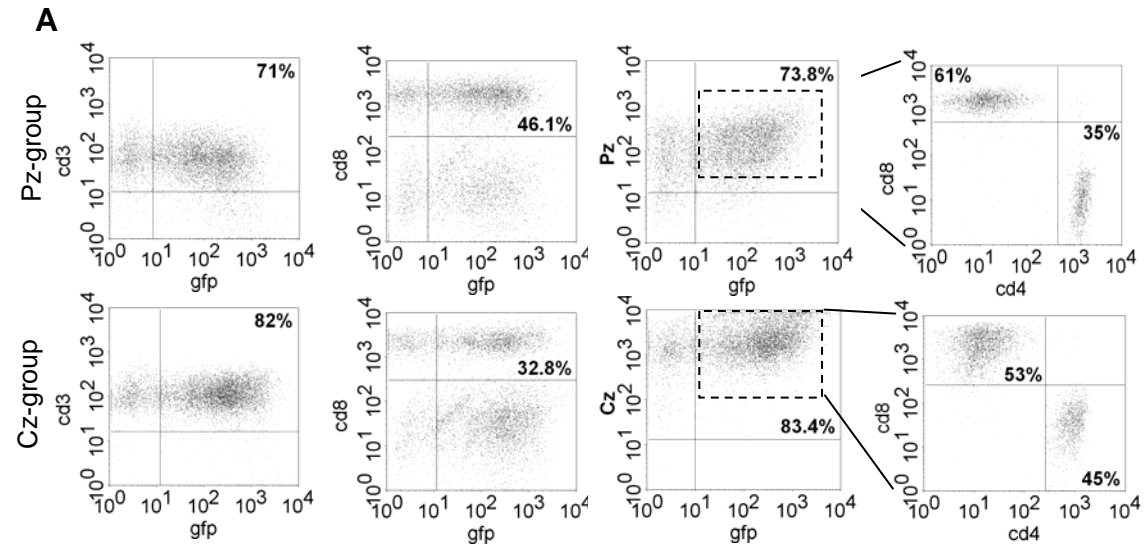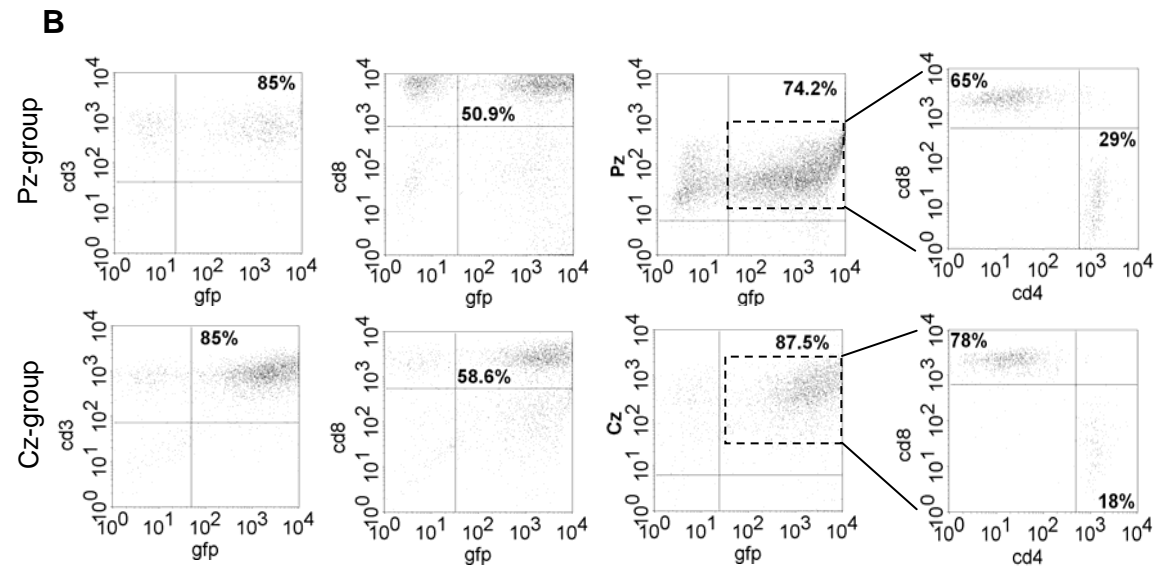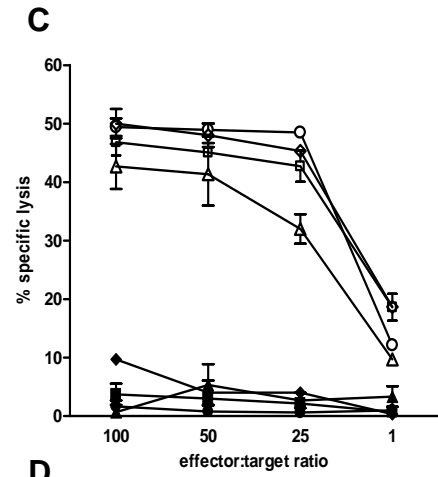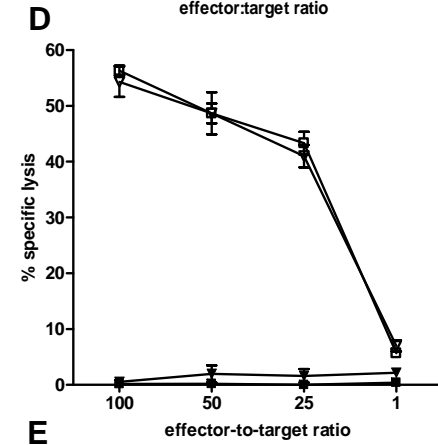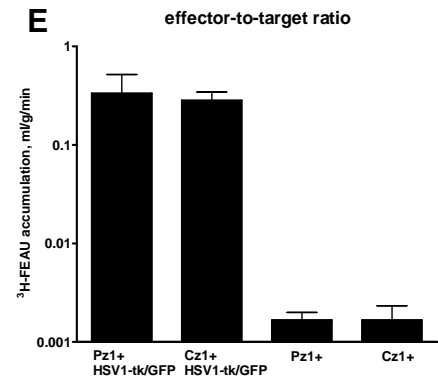

Supplementary Fig. 1

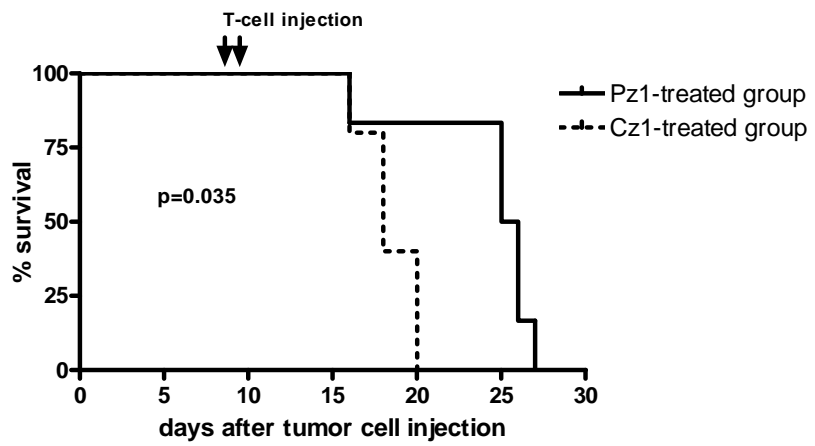

Supplementary Fig. 3

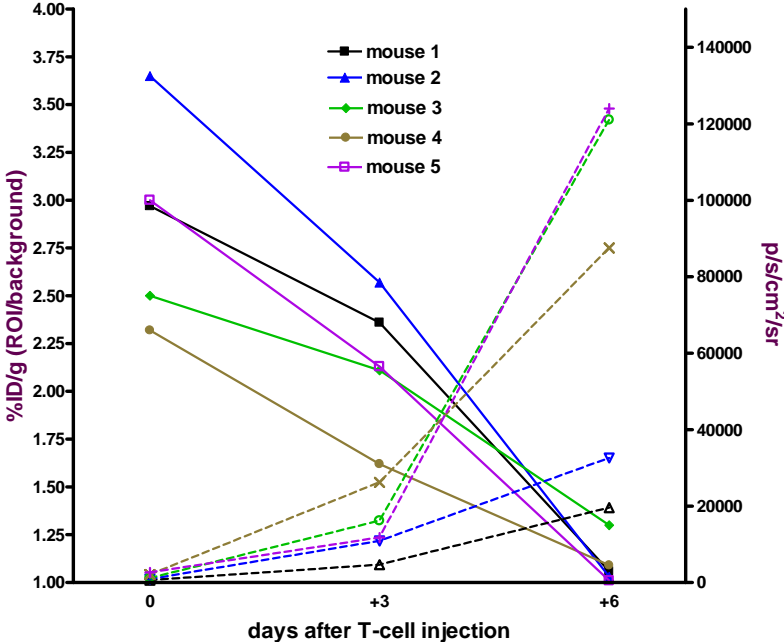

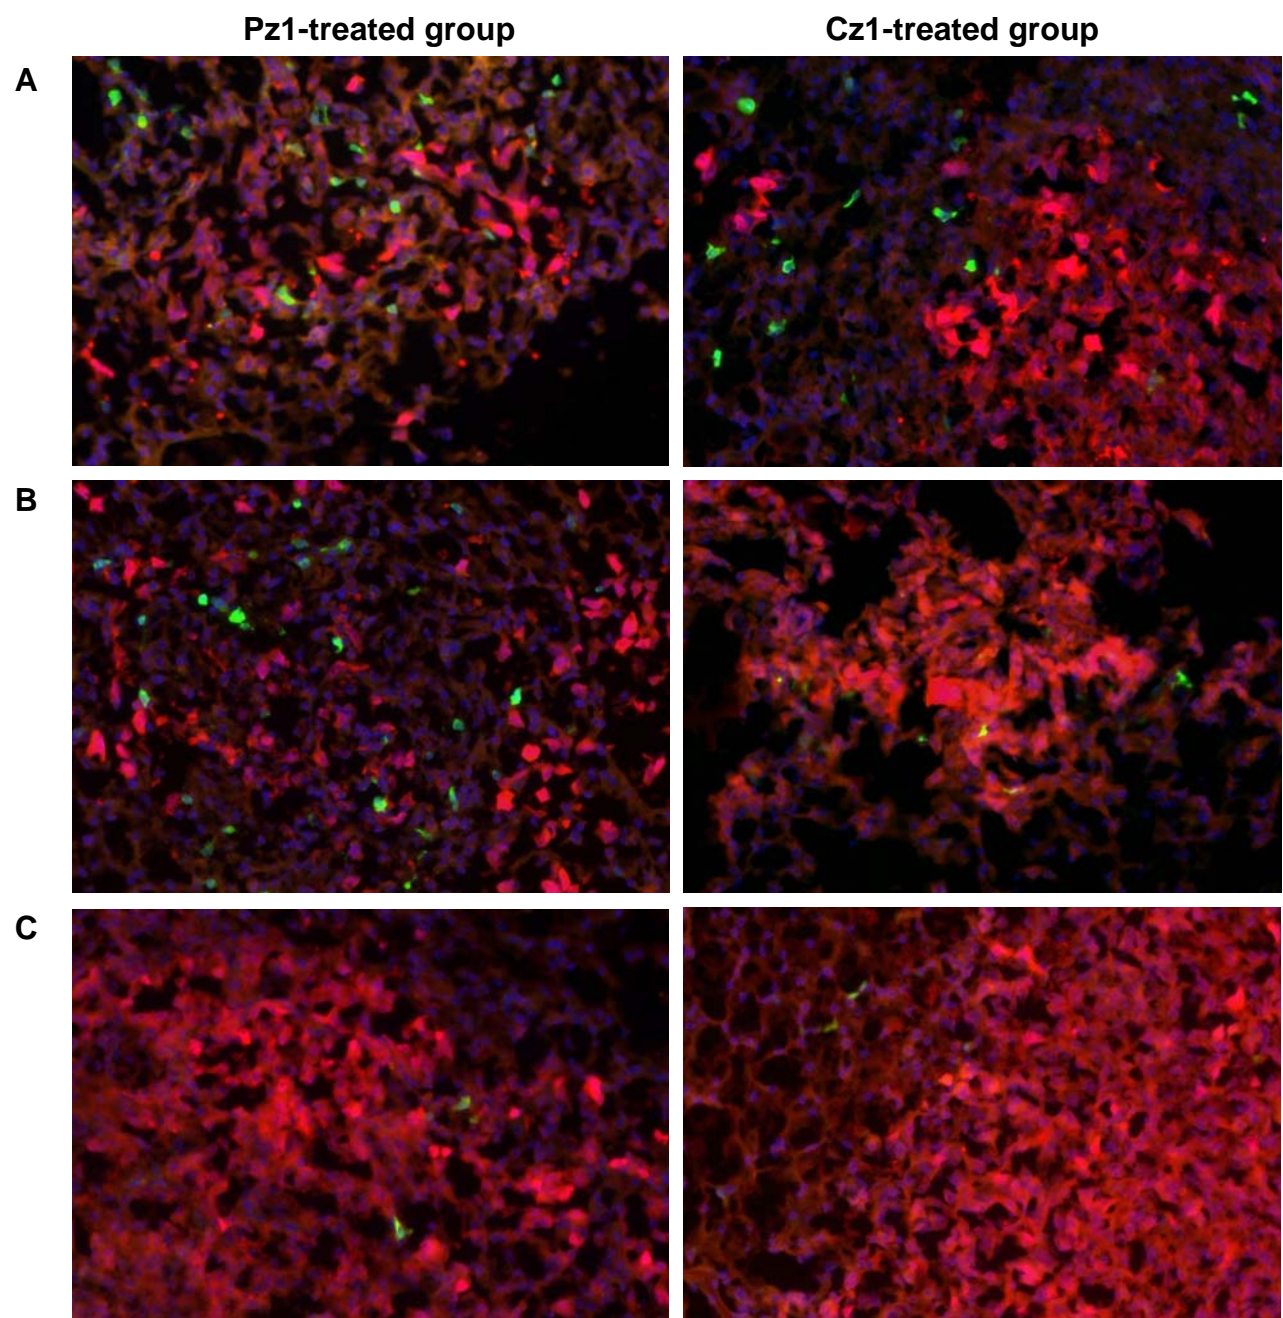

Supplementary Fig. 4



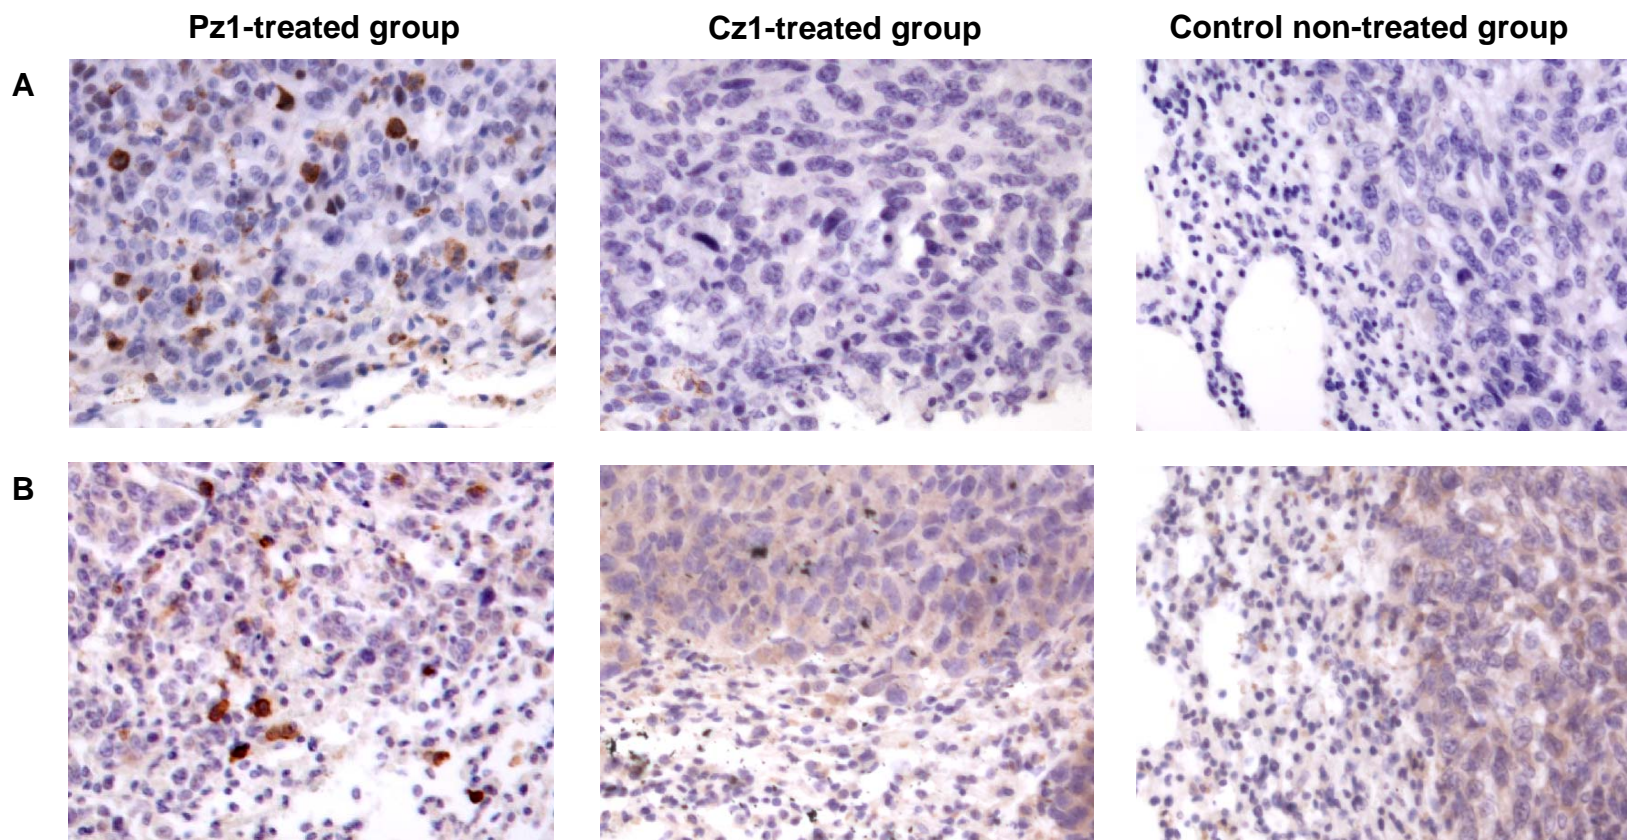

Supplement: 47324_Supplementary_Figures.pdf [file 47324_Supplementary_Figures.pdf]
